# Supplementary material for: An Effective Strategy for Template-Free Electrodeposition of Aluminum Nanowires with Highly Controllable Irregular Morphologies
Source: MDPI journal article supplement (doi:10.3390/nano12091390), 2022-04-19
Supplement: s1 [file s1]

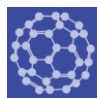

Supplementary materials

# An Effective Strategy for Template-Free Electrodeposition of Aluminum Nanowires with Highly Controllable Irregular Morphologies

Heng Wang <sup>1</sup>, Guo-Min Li <sup>1</sup>, Bing Li <sup>1,\*</sup> and Jing-Lin You <sup>2,\*</sup>

<sup>1</sup> School of Mechanical and Power Engineering, East China University of Science and Technology, No.130 Mei long Road, Shanghai 200237, China; wh1wh2wh3wh@163.com (H.W.); liguominyumifei@163.com (G.-M.L.)

<sup>2</sup> State Key Laboratory of Advanced Special Steel, School of Materials Science and Engineering, Shanghai University, Shanghai 200444, China

\* Correspondence: bingli@ecust.edu.cn (B.L.); jlyou@staff.shu.edu.cn (J.-L.Y.)

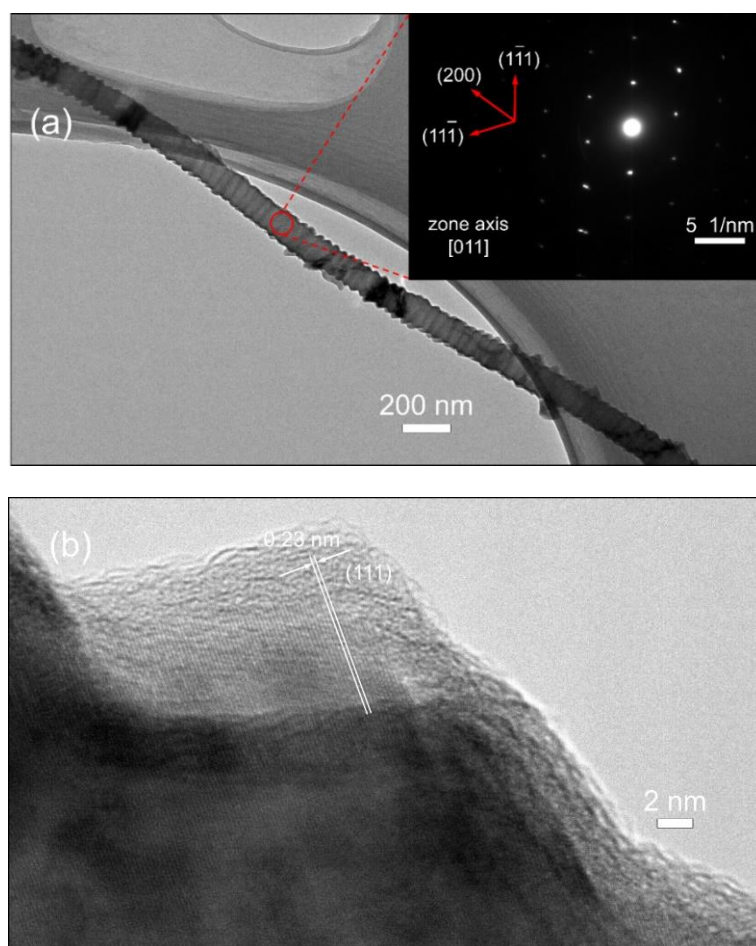

**Figure S1.** SAED pattern (inset in (a)) and HRTEM image (b) of the bellows-like Al nanowire electrodeposition at  $-1.0$  V for 120 s at  $25$  °C with a 2 mm thick insulation ring (inner diameter was 6 mm).

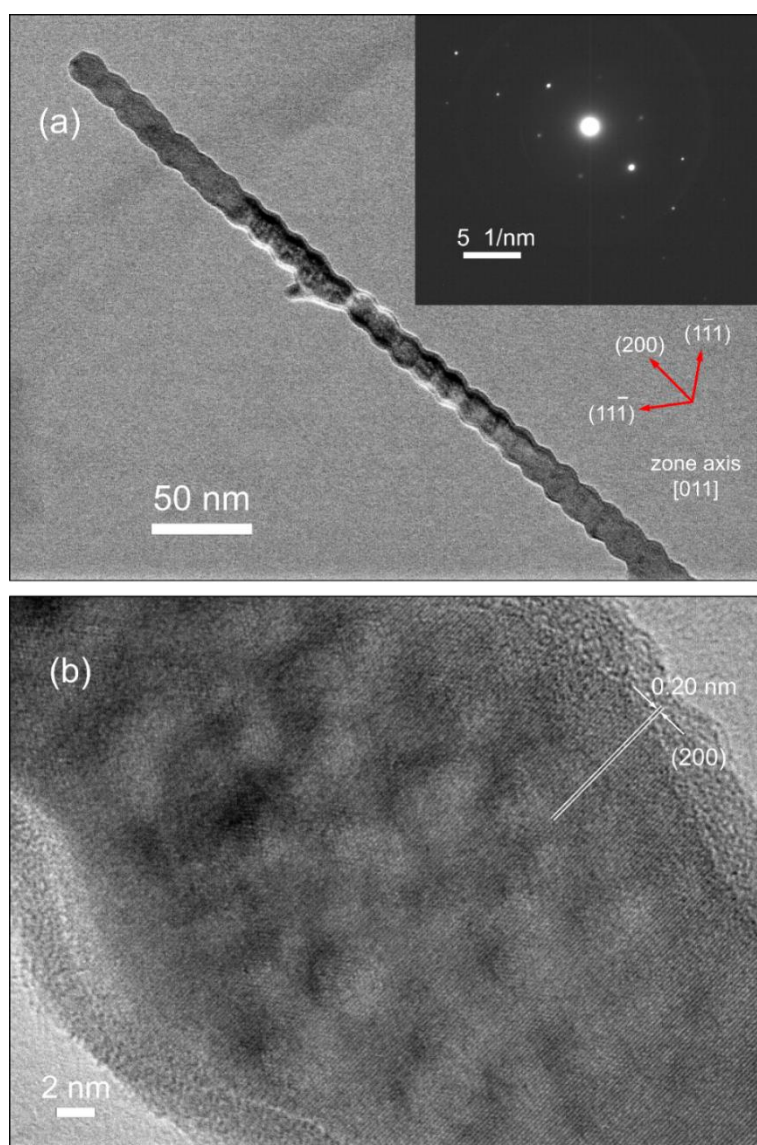

**Figure S2.** SAED pattern (inset in (a)) and HRTEM image (b) of the bead-chain-like Al nanowire electrodeposition at  $-1.2$  V for 120 s at  $25$  °C with a 2 mm thick insulation ring (inner diameter was 6 mm).

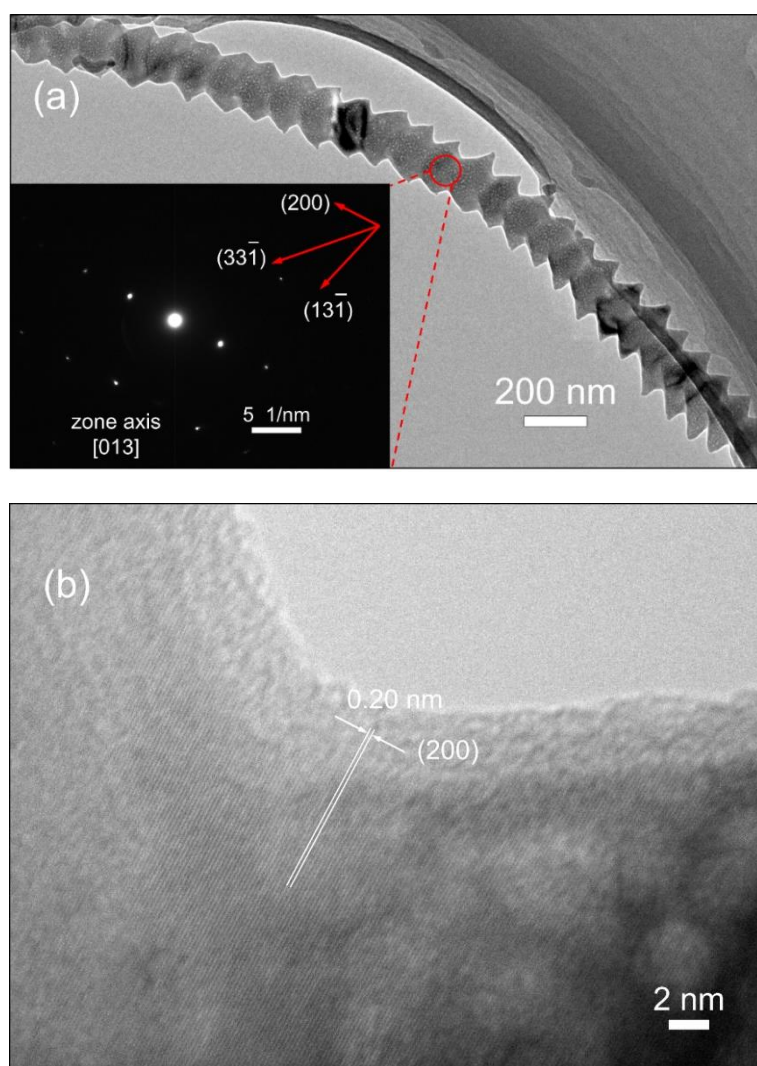

**Figure S3.** Selected area electron diffraction (SAED) pattern (inset in (a)) and HRTEM image (b) of the spine-like Al nanowire electrodeposition at  $-1.4$  V for 120 s at  $25$  °C with a 2 mm thick insulation ring (inner diameter was 6 mm).
